# Supplementary material for: Accordion-like swelling of layered perovskite crystals via massive permeation of aqueous solutions into 2D oxide galleries
Source: Royal Society of Chemistry journal article supplement (doi:10.1039/c5cc05408g), 2015-01-01
Supplement: c5cc05408g1.pdf [file c5cc05408g1.pdf]

## Supporting information

### Accordion-like swelling of layered perovskite crystals via massive permeation of aqueous solutions into 2D oxide galleries

Yeji Song, Nobuo Iyi, Tatsumasa Hoshide, Tadashi C. Ozawa, Yasuo Ebina, Renzhi Ma, Nobuyoshi Miyamoto, and Takayoshi Sasaki

International Center for Materials Nanoarchitectonics, National Institute for Materials Science,  
1-1 Namiki, Tsukuba, Ibaraki, Japan

Materials Science and Engineering, Graduate School of Pure and Applied Sciences, University of  
Tsukuba, 1-1-1 Tennodai, Tsukuba, Ibaraki, Japan.

Department of Life, Environment and Materials Science, Fukuoka Institute of Technology,  
Wajiro-Higashi, Higashi-ku, Fukuoka, Japan

*Fax: (+81) 29-854-9061; E-mail: [SASAKI.Takayoshi@nims.go.jp](mailto:SASAKI.Takayoshi@nims.go.jp)*

#### *Contents:*

- S-1. Preparation procedure of  $\text{KCa}_2\text{Nb}_3\text{O}_{10}$  crystals
- S-2. Powder XRD patterns of  $\text{KCa}_2\text{Nb}_3\text{O}_{10}$  before and after acid-exchange
- S-3. SEM and chemical analysis results before and after acid-exchange
- S-4. SEM images of the flux-grown  $\text{KCa}_2\text{Nb}_3\text{O}_{10}$  crystals and polycrystals obtained by the solid-state calcination
- S-5. Model of TBA ion and its projected configuration on the perovskite layer
- S-6. Comparison of swelling behaviors of the layered perovskite and layered titanate
- S-7. Histograms of the swollen crystal length at various  $\text{TBA}^+$  concentrations
- S-8. SEM images of the delaminated nanosheets

### S-1. Preparation procedure of $\text{KCa}_2\text{Nb}_3\text{O}_{10}$ crystals

To obtain crystals of several tens of  $\mu\text{m}$  in size, the optimum starting mixture is a combination of  $\text{K}_2\text{SO}_4$ - $\text{CaCO}_3$ - $\text{Nb}_2\text{O}_5$  with 5 : 4 : 3 in mol ratio, which corresponds to 20 mol% solute concentration ( $=\text{solute}/\{\text{solute}+\text{flux}\}$ ). After ground in an agate mortar, the mixture was placed in a Pt crucible and heated in an electric furnace. At first, the mixture was heated to 900 °C at 300 °C/h, and to 1300 °C at 100 °C/h, and then kept at this temperature for 24 h. It was cooled down to 800 °C at a rate of 25 °C/h and then the furnace was switched off. After removal of the flux in water and filtration of the product,  $\text{KCa}_2\text{Nb}_3\text{O}_{10}$  crystals with the size in the range  $\mu\text{m}$  to several hundred  $\mu\text{m}$  were collected. No secondary phase was detected in the powder XRD profile as shown in Fig S-2(b).

S-2 Powder XRD patterns of  $\text{KCa}_2\text{Nb}_3\text{O}_{10}$  before and after acid-exchange

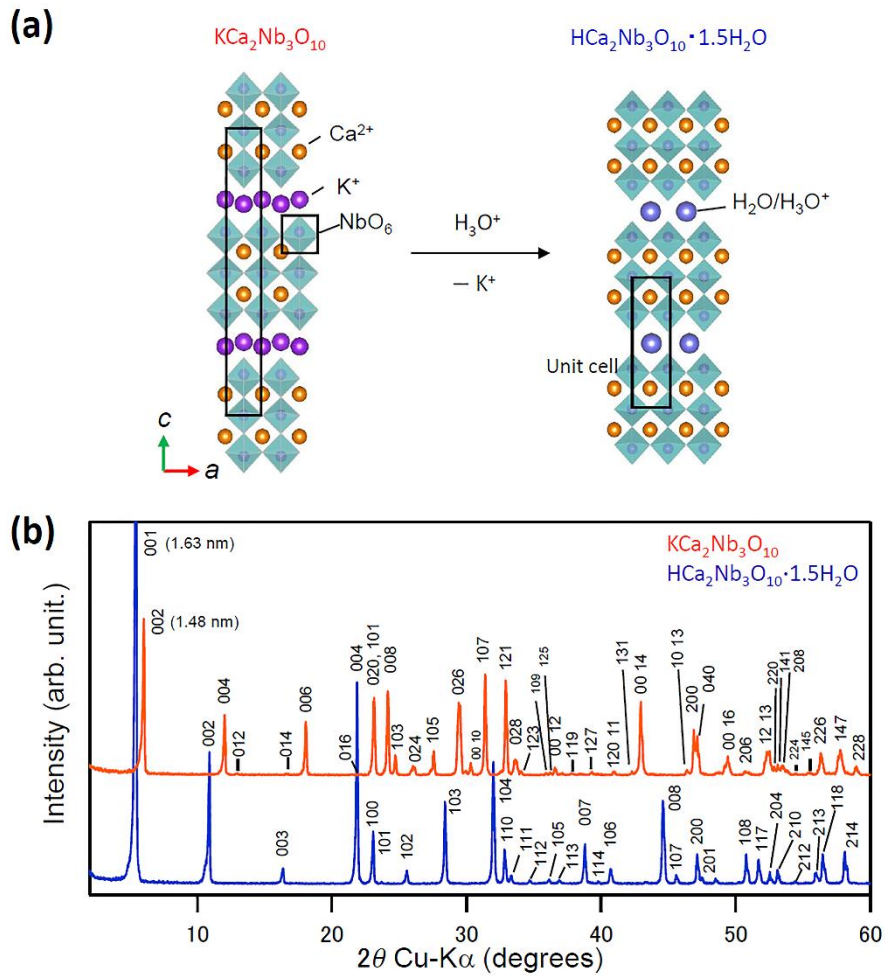

**Fig. S-2** (a) Schematic structure of  $\text{KCa}_2\text{Nb}_3\text{O}_{10}$  and that after the acid treatment ( $\text{HCa}_2\text{Nb}_3\text{O}_{10}\cdot 1.5\text{H}_2\text{O}$ ). (b) XRD patterns of  $\text{KCa}_2\text{Nb}_3\text{O}_{10}$  and  $\text{HCa}_2\text{Nb}_3\text{O}_{10}\cdot 1.5\text{H}_2\text{O}$ . All the observed peaks could be indexed on the basis of orthorhombic and tetragonal system, respectively.<sup>[1,2]</sup> The powder XRD was measured for  $\text{HCa}_2\text{Nb}_3\text{O}_{10}\cdot 1.5\text{H}_2\text{O}$  at 80% RH. For  $\text{KCa}_2\text{Nb}_3\text{O}_{10}$ , the peaks were indexed with the order  $(h/k)$  instead of  $(hkl)$  for the convenience.<sup>[2]</sup>

S-3. SEM and composition analysis results before and after acid-exchange

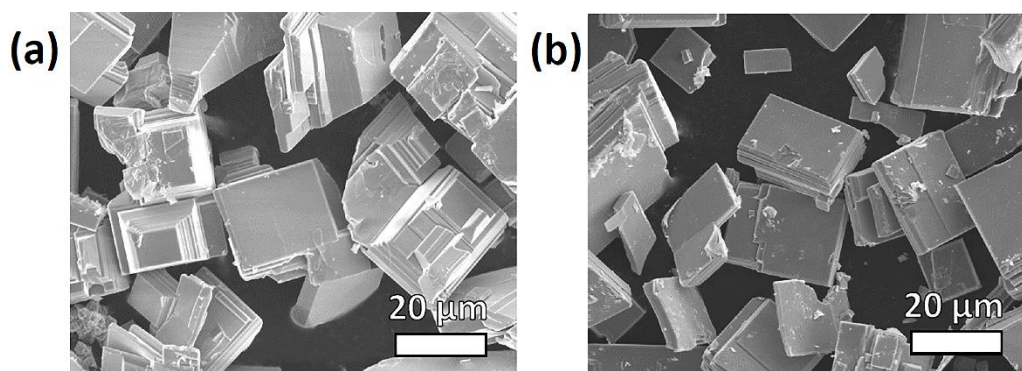

**Fig. S-1** SEM images of (a)  $\text{KCa}_2\text{Nb}_3\text{O}_{10}$  and (b)  $\text{HCa}_2\text{Nb}_3\text{O}_{10}\cdot 1.5\text{H}_2\text{O}$  crystals. Outer crystal shape was maintained, while tiny cleaves appeared on the side facets of the crystals after the acid treatment.

**Table. S-3** Compositions (wt%) of  $\text{KCa}_2\text{Nb}_3\text{O}_{10}$  and  $\text{HCa}_2\text{Nb}_3\text{O}_{10}\cdot 1.5\text{H}_2\text{O}$  crystals determined by chemical analysis.

| Composition                                                       |        | K (%) | Ca (%) | Nb (%) | H <sub>2</sub> O (%) |
|-------------------------------------------------------------------|--------|-------|--------|--------|----------------------|
| $\text{KCa}_2\text{Nb}_3\text{O}_{10}$                            | obsd.  | 7.14  | 13.9   | 49.3   | -                    |
|                                                                   | calcd. | 7.01  | 14.4   | 50.0   | -                    |
| $\text{HCa}_2\text{Nb}_3\text{O}_{10}\cdot 1.5\text{H}_2\text{O}$ | obsd.  | 0.12  | 14.1   | 50.2   | 5.41                 |
|                                                                   | calcd. | 0.00  | 14.7   | 51.1   | 4.94                 |

The exchange of  $\text{K}^+$  in  $\text{KCa}_2\text{Nb}_3\text{O}_{10}$  into  $\text{H}^+$  was almost complete (98.3 %), and no dissolution of Ca and Nb was observed.

S-4. SEM images of the flux-grown  $\text{KCa}_2\text{Nb}_3\text{O}_{10}$  crystals and polycrystals obtained by the solid-state calcination

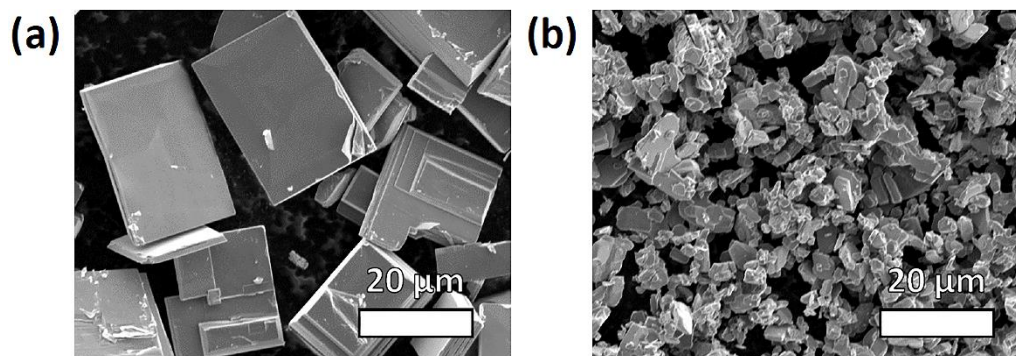

**Fig. S-4** SEM images of (a) flux-grown  $\text{KCa}_2\text{Nb}_3\text{O}_{10}$  crystals and (b)  $\text{KCa}_2\text{Nb}_3\text{O}_{10}$  polycrystals synthesized by the conventional solid-state calcination method. Rectangular crystals with size several tens of  $\mu\text{m}$  were obtained in (a), while aggregates of tiny crystallites were observed in (b).

S-5. Model of TBA ion and its projected configuration on the perovskite layer

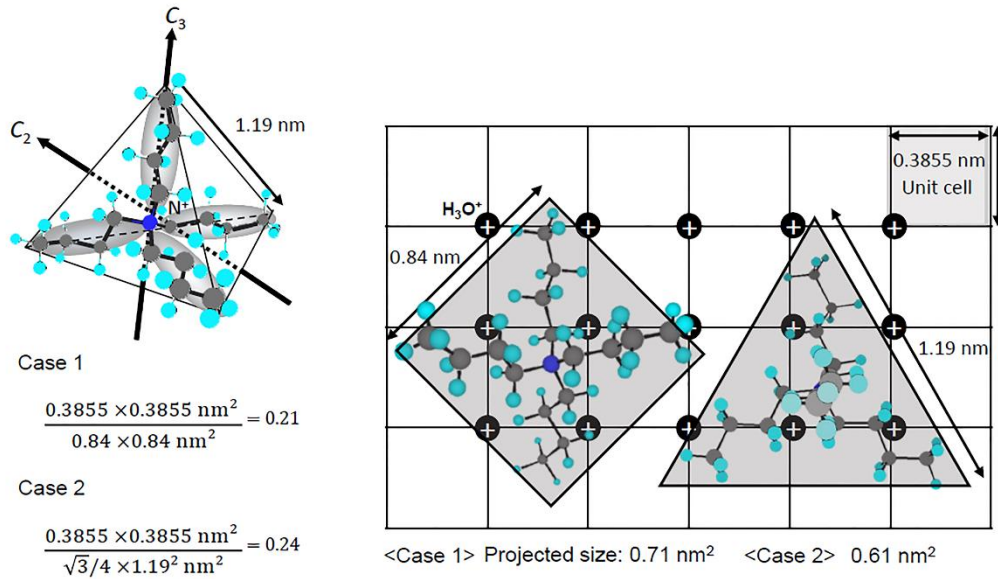

**Fig. S-5** Schematic structure and projected sizes of TBA ion. The projected area can be varied from 0.61 to 0.71 nm<sup>2</sup> depending on its orientation.<sup>[3]</sup> The unit cell area is 0.149 nm<sup>2</sup>, hence 0.21-0.24TBA ion covers a one side of the oxide layer. The layer has two faces, resultantly, 0.42-0.48TBA ion can be incorporated on a unit cell which is near to experimental value ~40 %. The molecular model was drawn using Chem 3D<sup>®</sup> (Cambridge Soft).

S-6. Comparison of swelling behaviors of the layered perovskite and layered titanate

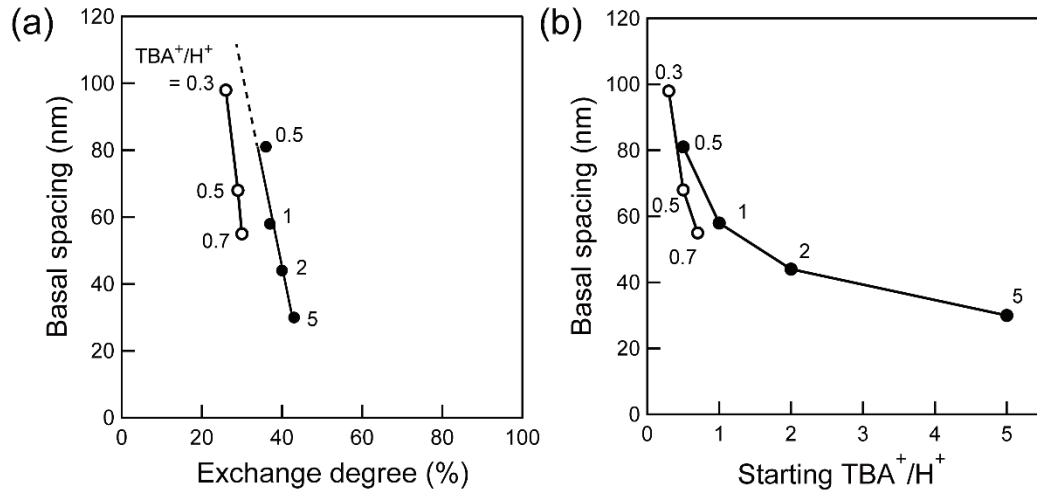

**Fig. S-6** Expanded basal spacing as a function of (a) exchange degree expressed as percentage relative to the amount of  $\text{H}^+$  in the crystal and (b) starting TBAOH concentration represented as the ratio of  $\text{H}^+$  in the crystal. The filled symbol represents  $\text{HCa}_2\text{Nb}_3\text{O}_{10} \cdot 1.5\text{H}_2\text{O}$  while the open symbol represents  $\text{H}_{0.8}\text{Ti}_{1.2}\text{Fe}_{0.8}\text{O}_4 \cdot \text{H}_2\text{O}$ .<sup>[4]</sup> The maximum degree of swelling observed at the full exchange of TBA ions and then it decreased with increasing the  $\text{TBA}^+$  concentration in the both systems.

S-7. Histograms of the swollen crystal length at various TBA<sup>+</sup> concentrations

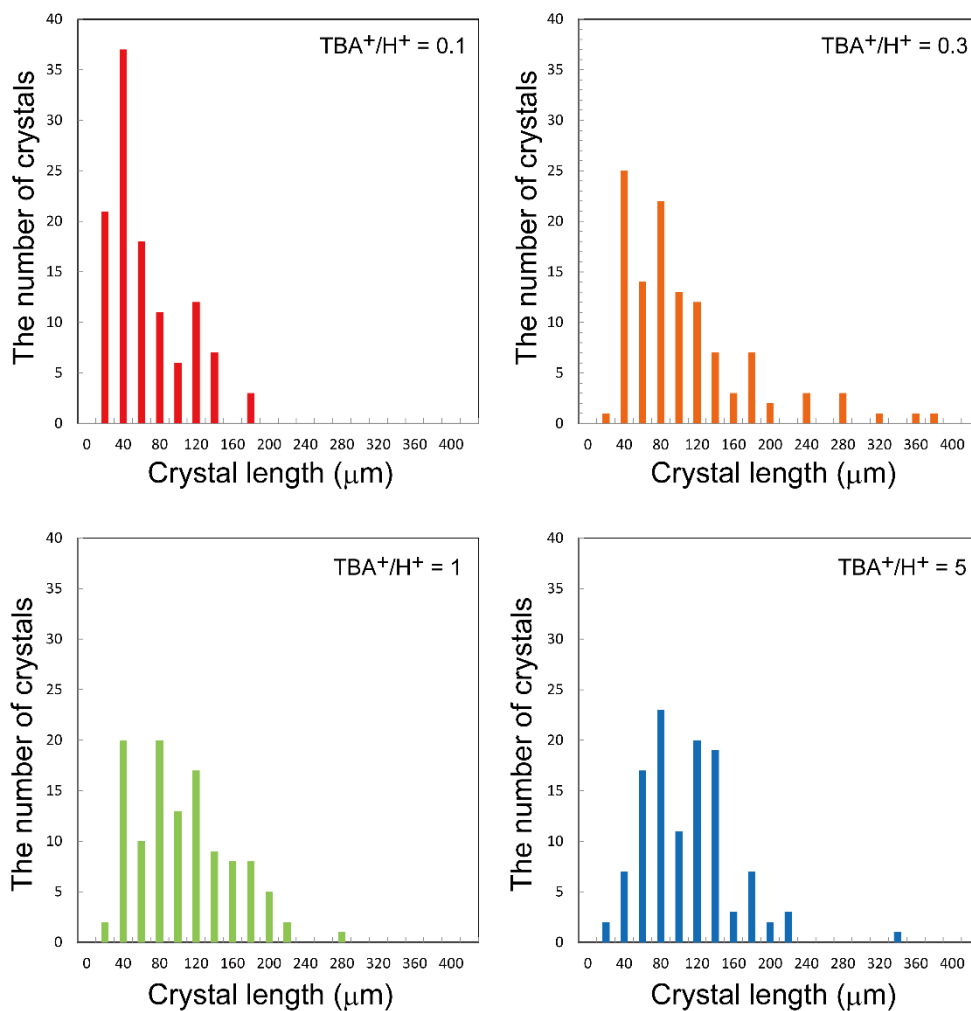

**Fig. S-7** The length distribution of the swollen crystals with the TBAOH solutions at different concentrations (TBA<sup>+</sup>/H<sup>+</sup> = 0.1-5). The histograms were made from the optical microscope images of each sample.



S-8 SEM images of the delaminated nanosheets

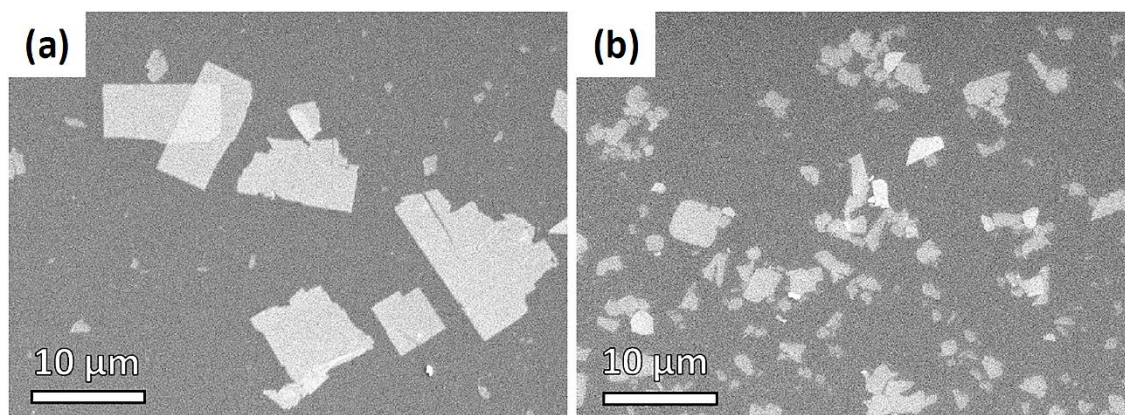

**Fig. S-8** SEM images of  $\text{Ca}_2\text{Nb}_3\text{O}_{10}^-$  nanosheets derived from (a) single crystal and (b) powder polycrystalline samples of  $\text{KCa}_2\text{Nb}_3\text{O}_{10}$ .

## References

- [1] A. J. Jacobson, J. T. Lewandowski, and J. W. Johnson, *J. Less-Common Metals*, 1986, **116**, 137-146.
- [2] H. Fukuoka, T. Isami, and S. Yamanaka, *J. Solid State Chem.*, 2000, **151**, 40-45.
- [3] T. Sasaki and M. Watanabe, *Mol. Cryst. Liq. Cryst.*, 1998, **311**, 417-422.
- [4] F. Geng, R. Ma, Y. Ebina, Y. Yamauchi, N. Miyamoto, and T. Sasaki, *J. Am. Chem. Soc.*, 2014, **136**, 5491-5500.
